# Supplementary material for: Design of 1D and 2D molecule-based magnets with the ligand 4,5-dimethyl-1,2-phenylenebis(oxamato)
Source: Royal Society of Chemistry journal article supplement (doi:10.1039/c0dt00796j), 2010-12-03
Supplement: c0dt00796j.pdf [file c0dt00796j.pdf]

## Design of 1D and 2D molecule-based magnets with the ligand 4,5-dimethyl-1,2-phenylenebis(oxamato)

Cynthia L.M. Pereira,<sup>\*a</sup> Emerson F. Pedroso,<sup>b</sup> Antônio C. Doriguetto,<sup>c</sup> Javier A. Ellena,<sup>d</sup> Kamal Boubekeur,<sup>e</sup> Yasmine Filali,<sup>e</sup> Yves Journaux,<sup>\*e,f</sup> Miguel A. Novak,<sup>g</sup> and Humberto O. Stumpf<sup>a</sup>

<sup>a</sup> Departamento de Química, Universidade Federal de Minas Gerais, Av. Antônio Carlos, 6627, Pampulha, Belo Horizonte, Minas Gerais, 31270-910, BRAZIL. Fax: +55 31 3409 5700; Tel: +55 31 3409 5743; E-mail: [stumpf@ufmg.br](mailto:stumpf@ufmg.br).

<sup>b</sup> Centro Federal de Educação Tecnológica de Minas Gerais, Belo Horizonte, MG, 30480-000, BRAZIL.

<sup>c</sup> Universidade Federal de Alfenas, Alfenas, MG, BRAZIL.

<sup>d</sup> Instituto de Física de São Carlos, Universidade de São Paulo, São Carlos, SP, 13560-970, BRAZIL.

<sup>e</sup> Laboratoire de Chimie Inorganique et Matériaux Moléculaires, Université Pierre et Marie Curie-Paris 6, UMR 7071, Paris 75252, FRANCE. Fax: +33 144-273-841; E-mail: [yves.journaux@upmc.fr](mailto:yves.journaux@upmc.fr).

<sup>f</sup> CNRS, UMR7201, Institut Parisien de Chimie Moléculaire, Paris, FRANCE.

<sup>g</sup> Instituto de Física, Universidade Federal do Rio de Janeiro - UFRJ, Rio de Janeiro, RJ, 21945-970, BRAZIL.

### Crystallographic Supplementary Material for [MnCu(dmopba)(H<sub>2</sub>O)<sub>3</sub>]<sub>n</sub>·4nH<sub>2</sub>O (**1**)

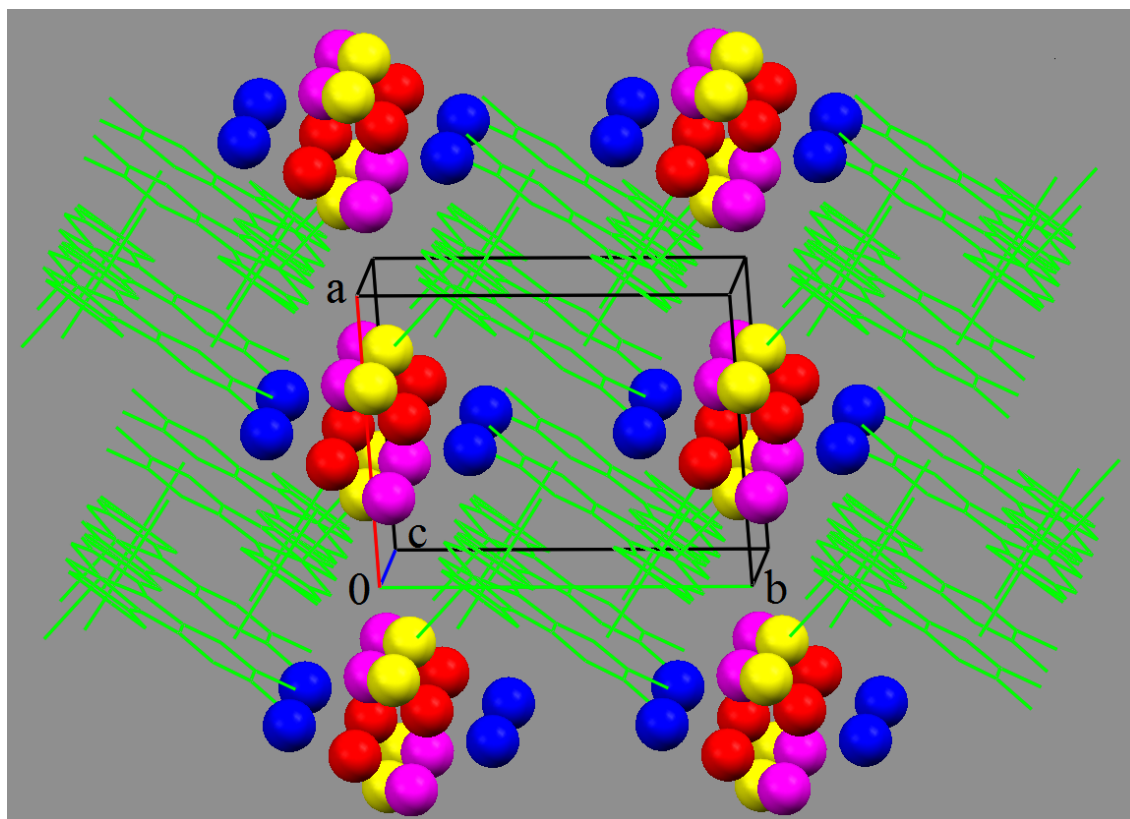

SM1. Mercury\* view of compound **1** showing the crystal packing. It is possible to see the double chain (in green) formed along [001] direction and the channel filled by water molecules. Coloured balls represent the water molecules. Colour identification: O10 in blue, O11 in yellow, O12 in red, O13 in pink.

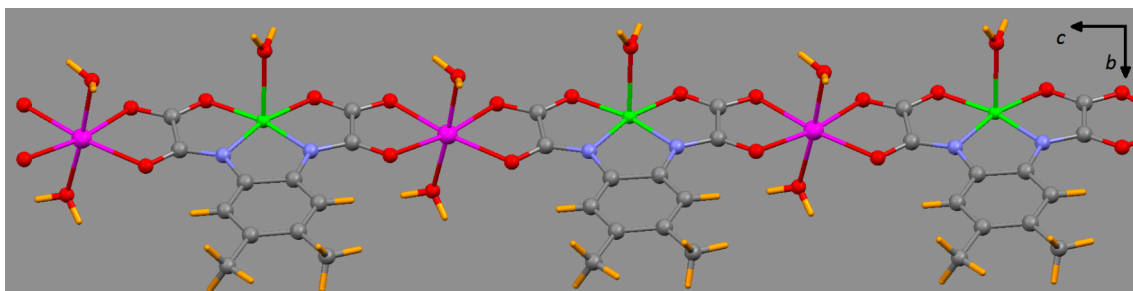

SM2. Mercury\* view of compound **1** showing an individual chain along [001] direction. The aromatic rings lying in a same side of the chain. Non-coordinated water molecules were omitted for clarity.

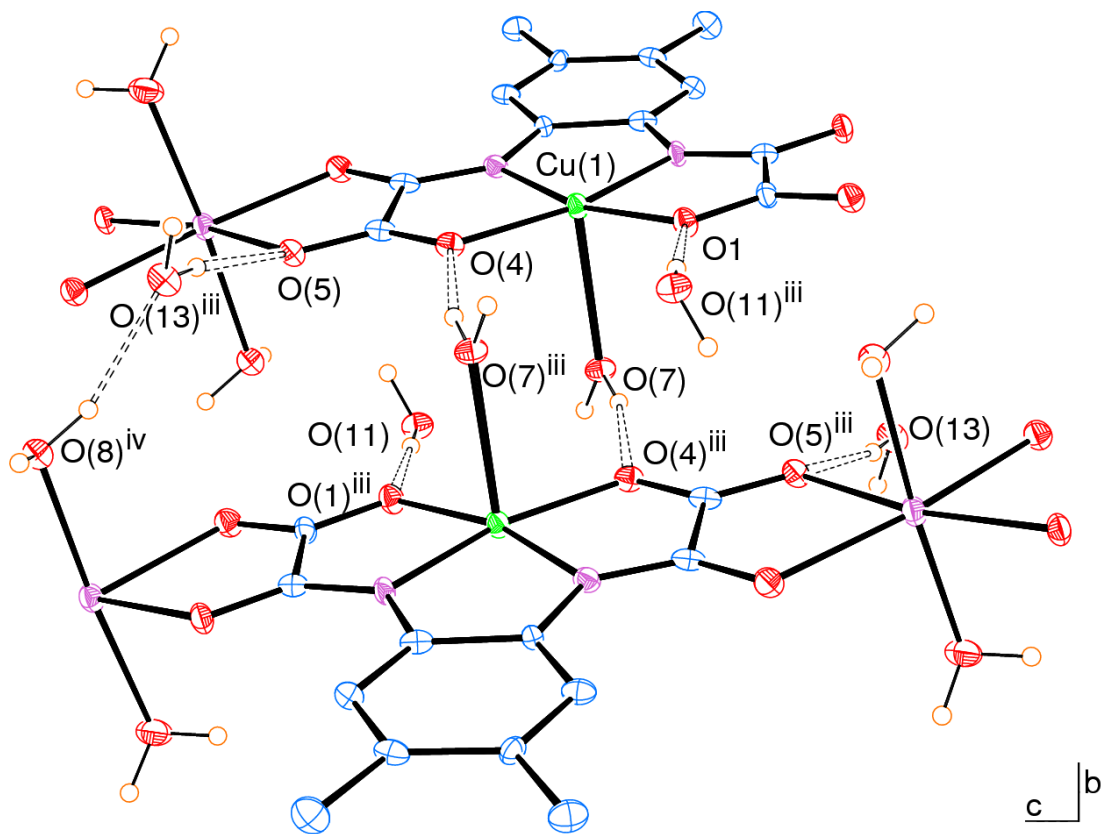

SM3. Ortep-3+ view of **1** showing the classical intermolecular hydrogen bonds stabilize the packing. Methyl and aromatic hydrogen were omitted for clarity. Symmetry codes: <sup>iii</sup>  $-x+2, -y, -z+1$ ; <sup>iv</sup>  $-x+2, -y, -z+2$ .

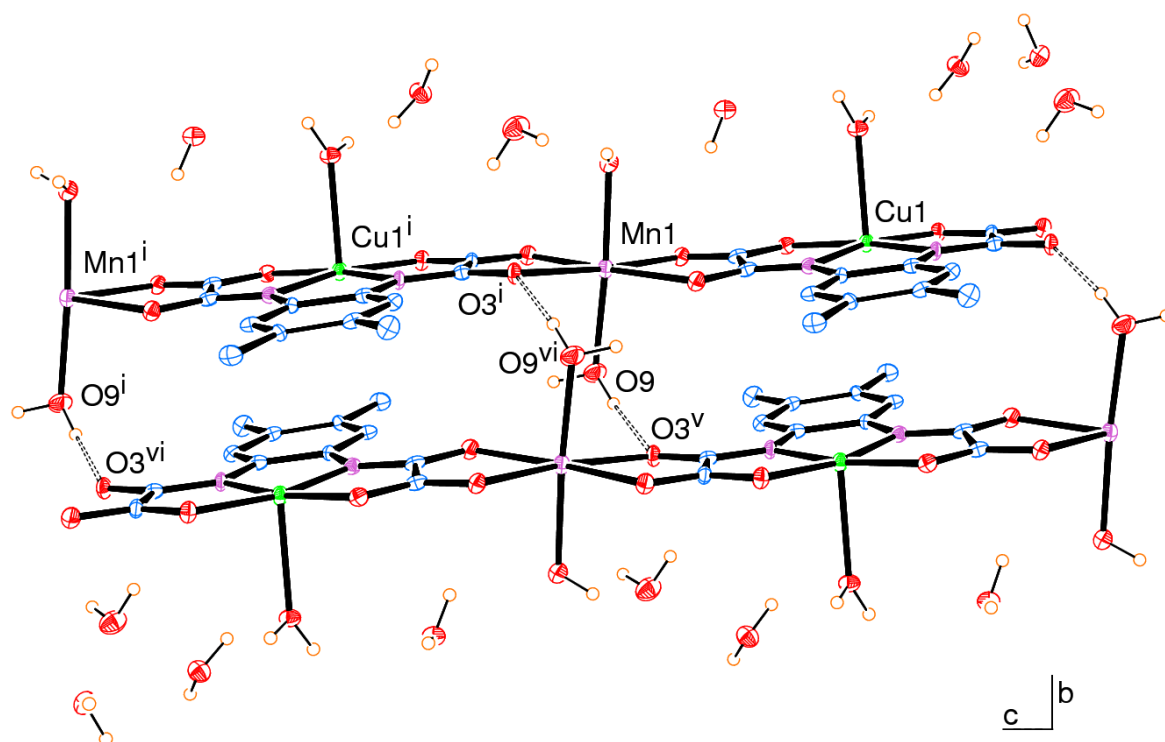

SM4. Ortep-3+ view of **1** showing the classical intermolecular hydrogen bonds that stabilize the double chain formed along [001]. Methyl and aromatic hydrogen were omitted for clarity. Symmetry codes: <sup>i</sup>  $x, y, z+1$ ; <sup>v</sup>  $-x+2, -y+1, -z+1$ ; <sup>vi</sup>  $-x+2, -y+1, -z+2$ .

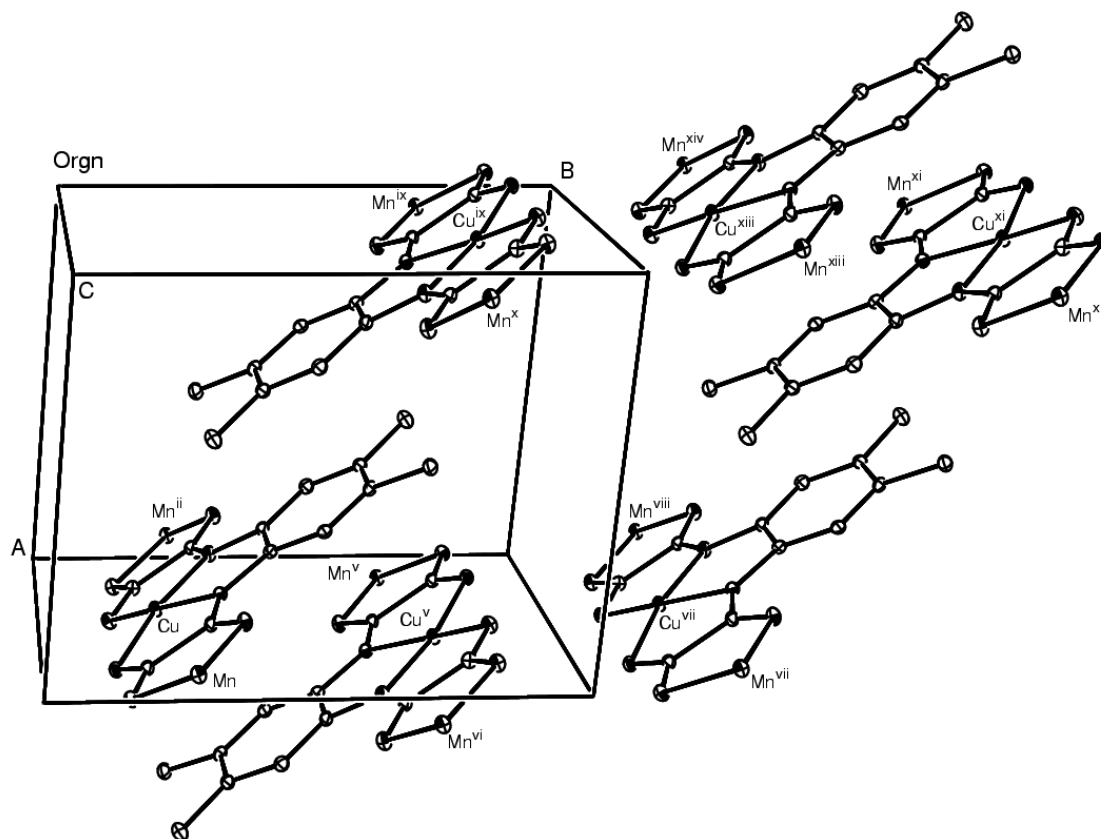

SM5. Ortep-3 view of **1** highlighting the closest metal–metal separations: Mn–Cu = 5.430 Å, Cu–Mn<sup>ii</sup> = 5.427 Å, Cu–Cu<sup>v</sup> = 5.788 Å, Mn–Mn<sup>vi</sup> = 4.788 Å, Cu<sup>v</sup>–Cu<sup>vii</sup> = 5.023 Å, Mn<sup>vi</sup>–Mn<sup>vii</sup> = 6.102 Å. All water molecules and hydrogen atoms were omitted for clarity. Symmetry codes: <sup>ii</sup>  $x, y, z-1$ ; <sup>v</sup>  $-x+2, -y+1, -z+1$ ; <sup>vi</sup>  $-x+2, -y+1, -z+2$ ; <sup>vii</sup>  $x, y+1, z$ ; <sup>viii</sup>  $x, y+1, z-1$ ; <sup>ix</sup>  $-x+1, -y+1, -z+1$ ; <sup>x</sup>  $-x+1, -y+1, -z+2$ ; <sup>xi</sup>  $-x+1, -y+2, -z+1$ ; <sup>xii</sup>  $-x+1, -y+2, -z+2$ ; <sup>xiii</sup>  $x-1, y+1, z$ ; <sup>xiv</sup>  $x-1, y+1, z-1$

SM6. Crystal data and structure refinement for **1**.

|                                   |                                                                                                |
|-----------------------------------|------------------------------------------------------------------------------------------------|
| Empirical formula                 | C <sub>12</sub> H <sub>22</sub> Cu <sub>1</sub> Mn <sub>1</sub> N <sub>2</sub> O <sub>13</sub> |
| Formula weight                    | 520.80                                                                                         |
| Temperature                       | 100(2) K                                                                                       |
| Wavelength                        | 0.71073 Å                                                                                      |
| Crystal system                    | Triclinic                                                                                      |
| Space group                       | P $\bar{1}$                                                                                    |
| Unit cell dimensions              | a = 8.4666(3) Å $\alpha$ = 89.873(4)°                                                          |
|                                   | b = 10.5796(5) Å $\beta$ = 95.912(4)°                                                          |
|                                   | c = 10.7969(4) Å $\gamma$ = 93.725(2)°                                                         |
| Volume                            | 959.93(7) Å <sup>3</sup>                                                                       |
| Z                                 | 2                                                                                              |
| Density (calculated)              | 1.802 Mg/m <sup>3</sup>                                                                        |
| Absorption coefficient            | 1.836 mm <sup>-1</sup>                                                                         |
| F(000)                            | 532                                                                                            |
| Crystal size                      | 0.13 x 0.07 x 0.03 mm <sup>3</sup>                                                             |
| Theta range for data collection   | 3.42 to 25.00°                                                                                 |
| Index ranges                      | -10 ≤ h ≤ 9, -12 ≤ k ≤ 12, 0 ≤ l ≤ 12                                                          |
| Reflections collected             | 3242                                                                                           |
| Independent reflections           | 3242 [R(int) = 0.0000]                                                                         |
| Completeness to theta = 25.00°    | 96.0 %                                                                                         |
| Max. and min. transmission        | 0.9470 and 0.7963                                                                              |
| Refinement method                 | Full-matrix least-squares on F <sup>2</sup>                                                    |
| Data / restraints / parameters    | 3242 / 0 / 263                                                                                 |
| Goodness-of-fit on F <sup>2</sup> | 1.140                                                                                          |
| Final R indices [I > 2σ(I)]       | R1 = 0.0617, wR2 = 0.1943                                                                      |
| R indices (all data)              | R1 = 0.0703, wR2 = 0.2062                                                                      |
| Extinction coefficient            | 0.012(5)                                                                                       |
| Largest diff. peak and hole       | 0.894 and -0.951 e.Å <sup>-3</sup>                                                             |

SM7. Atomic coordinates ( $\times 10^4$ ) and equivalent isotropic displacement parameters ( $\text{\AA}^2 \times 10^3$ ) for **1**.  $U(\text{eq})$  is defined as one third of the trace of the orthogonalized  $U^{ij}$  tensor.

|       | x        | y       | z       | U(eq) |
|-------|----------|---------|---------|-------|
| C(1)  | 10113(7) | 1987(6) | 2057(6) | 20(1) |
| C(2)  | 9009(7)  | 3102(5) | 2090(6) | 20(1) |
| C(3)  | 7969(7)  | 4351(5) | 3725(6) | 21(1) |
| C(4)  | 7073(7)  | 5219(6) | 3066(6) | 21(1) |
| C(5)  | 6347(7)  | 6166(6) | 3653(6) | 22(1) |
| C(6)  | 6536(7)  | 6228(5) | 4967(6) | 19(1) |
| C(7)  | 7410(7)  | 5341(6) | 5635(6) | 22(1) |
| C(8)  | 8111(7)  | 4396(5) | 5057(5) | 17(1) |
| C(9)  | 9328(7)  | 3200(5) | 6817(6) | 21(1) |
| C(10) | 10369(7) | 2044(5) | 6991(6) | 22(1) |
| C(11) | 5384(8)  | 7084(6) | 2901(7) | 29(2) |
| C(12) | 5794(8)  | 7250(6) | 5623(7) | 27(1) |
| Cu(1) | 9789(1)  | 2305(1) | 4496(1) | 20(1) |
| Mn(1) | 9563(1)  | 2798(1) | 9478(1) | 22(1) |
| N(1)  | 8789(6)  | 3379(5) | 3235(5) | 19(1) |
| N(2)  | 8999(6)  | 3438(5) | 5629(5) | 20(1) |
| O(1)  | 10623(5) | 1497(4) | 3075(4) | 23(1) |
| O(2)  | 10445(5) | 1645(4) | 1017(4) | 24(1) |
| O(3)  | 8492(5)  | 3590(4) | 1069(4) | 23(1) |
| O(4)  | 10777(5) | 1516(4) | 6045(4) | 21(1) |
| O(5)  | 10715(5) | 1713(4) | 8097(4) | 22(1) |
| O(6)  | 8926(5)  | 3739(4) | 7755(4) | 24(1) |
| O(7)  | 7712(5)  | 679(4)  | 4386(4) | 23(1) |
| O(8)  | 7404(5)  | 1540(4) | 9133(4) | 25(1) |
| O(9)  | 11741(6) | 4011(4) | 9952(5) | 34(1) |
| O(10) | 4649(6)  | 2682(5) | 552(5)  | 41(1) |
| O(12) | 5463(5)  | 892(4)  | 2380(4) | 30(1) |
| O(11) | 7222(5)  | 337(4)  | 6862(4) | 26(1) |
| O(13) | 6850(5)  | -468(4) | 700(4)  | 28(1) |

SM8. Bond lengths [Å] for **1**.

---

|            |          |                          |          |
|------------|----------|--------------------------|----------|
| C(1)–O(2)  | 1.246(8) | C(9)–C(10)               | 1.553(9) |
| C(1)–O(1)  | 1.261(8) | C(10)–O(5)               | 1.255(8) |
| C(1)–C(2)  | 1.555(9) | C(10)–O(4)               | 1.255(8) |
| C(2)–O(3)  | 1.265(8) | Cu(1)–N(2)               | 1.913(5) |
| C(2)–N(1)  | 1.305(8) | Cu(1)–N(1)               | 1.934(5) |
| C(3)–C(4)  | 1.378(9) | Cu(1)–O(1)               | 1.973(4) |
| C(3)–N(1)  | 1.411(8) | Cu(1)–O(4)               | 1.998(4) |
| C(3)–C(8)  | 1.431(9) | Cu(1)–O(7)               | 2.372(4) |
| C(4)–C(5)  | 1.395(9) | Mn(1)–O(6)               | 2.144(5) |
| C(5)–C(6)  | 1.412(9) | Mn(1)–O(2) <sup>i</sup>  | 2.159(4) |
| C(5)–C(11) | 1.494(9) | Mn(1)–O(8)               | 2.191(5) |
| C(6)–C(7)  | 1.388(9) | Mn(1)–O(9)               | 2.193(5) |
| C(6)–C(12) | 1.500(8) | Mn(1)–O(3) <sup>i</sup>  | 2.215(4) |
| C(7)–C(8)  | 1.378(9) | Mn(1)–O(5)               | 2.223(4) |
| C(8)–N(2)  | 1.405(8) | O(2)–Mn(1) <sup>ii</sup> | 2.159(4) |
| C(9)–O(6)  | 1.251(8) | O(3)–Mn(1) <sup>ii</sup> | 2.215(4) |
| C(9)–N(2)  | 1.311(8) |                          |          |

---

Symmetry transformations used to generate equivalent atoms:

<sup>i</sup>  $x, y, z+1$     <sup>ii</sup>  $x, y, z-1$

SM9. Bond angles [°] for **1**.

---

|                 |            |                                            |            |
|-----------------|------------|--------------------------------------------|------------|
| O(2)–C(1)–O(1)  | 124.4(6)   | N(2)–Cu(1)–O(7)                            | 99.65(18)  |
| O(2)–C(1)–C(2)  | 117.2(5)   | N(1)–Cu(1)–O(7)                            | 96.56(18)  |
| O(1)–C(1)–C(2)  | 118.4(5)   | O(1)–Cu(1)–O(7)                            | 88.43(17)  |
| O(3)–C(2)–N(1)  | 130.8(6)   | O(4)–Cu(1)–O(7)                            | 89.11(16)  |
| O(3)–C(2)–C(1)  | 118.4(5)   | O(6)–Mn(1)–O(2) <sup>i</sup>               | 169.76(17) |
| N(1)–C(2)–C(1)  | 110.7(5)   | O(6)–Mn(1)–O(8)                            | 89.27(17)  |
| C(4)–C(3)–N(1)  | 127.2(6)   | O(2) <sup>i</sup> –Mn(1)–O(8)              | 91.24(17)  |
| C(4)–C(3)–C(8)  | 118.9(6)   | O(6)–Mn(1)–O(9)                            | 94.48(18)  |
| N(1)–C(3)–C(8)  | 113.9(5)   | O(2) <sup>i</sup> –Mn(1)–O(9)              | 85.23(18)  |
| C(3)–C(4)–C(5)  | 122.2(6)   | O(8)–Mn(1)–O(9)                            | 176.15(17) |
| C(4)–C(5)–C(6)  | 118.5(6)   | O(6)–Mn(1)–O(3) <sup>i</sup>               | 113.10(16) |
| C(4)–C(5)–C(11) | 120.4(6)   | O(2) <sup>i</sup> –Mn(1)–O(3) <sup>i</sup> | 77.14(16)  |
| C(6)–C(5)–C(11) | 121.1(6)   | O(8)–Mn(1)–O(3) <sup>i</sup>               | 87.56(17)  |
| C(7)–C(6)–C(5)  | 119.4(6)   | O(9)–Mn(1)–O(3) <sup>i</sup>               | 90.17(18)  |
| C(7)–C(6)–C(12) | 120.8(6)   | O(6)–Mn(1)–O(5)                            | 76.56(16)  |
| C(5)–C(6)–C(12) | 119.8(6)   | O(2) <sup>i</sup> –Mn(1)–O(5)              | 93.21(16)  |
| C(8)–C(7)–C(6)  | 122.1(6)   | O(8)–Mn(1)–O(5)                            | 89.87(16)  |
| C(7)–C(8)–N(2)  | 127.3(6)   | O(9)–Mn(1)–O(5)                            | 91.84(18)  |
| C(7)–C(8)–C(3)  | 118.8(5)   | O(3) <sup>i</sup> –Mn(1)–O(5)              | 169.94(16) |
| N(2)–C(8)–C(3)  | 113.9(5)   | C(2)–N(1)–C(3)                             | 131.2(5)   |
| O(6)–C(9)–N(2)  | 130.3(6)   | C(2)–N(1)–Cu(1)                            | 115.3(4)   |
| O(6)–C(9)–C(10) | 119.4(6)   | C(3)–N(1)–Cu(1)                            | 113.5(4)   |
| N(2)–C(9)–C(10) | 110.3(5)   | C(9)–N(2)–C(8)                             | 129.3(5)   |
| O(5)–C(10)–O(4) | 125.6(6)   | C(9)–N(2)–Cu(1)                            | 116.1(4)   |
| O(5)–C(10)–C(9) | 115.4(6)   | C(8)–N(2)–Cu(1)                            | 114.5(4)   |
| O(4)–C(10)–C(9) | 119.0(6)   | C(1)–O(1)–Cu(1)                            | 111.2(4)   |
| N(2)–Cu(1)–N(1) | 84.0(2)    | C(1)–O(2)–Mn(1) <sup>ii</sup>              | 115.0(4)   |
| N(2)–Cu(1)–O(1) | 166.4(2)   | C(2)–O(3)–Mn(1) <sup>ii</sup>              | 111.7(4)   |
| N(1)–Cu(1)–O(1) | 84.23(19)  | C(10)–O(4)–Cu(1)                           | 110.4(4)   |
| N(2)–Cu(1)–O(4) | 84.02(19)  | C(10)–O(5)–Mn(1)                           | 113.8(4)   |
| N(1)–Cu(1)–O(4) | 167.43(19) | C(9)–O(6)–Mn(1)                            | 114.2(4)   |
| O(1)–Cu(1)–O(4) | 107.21(17) |                                            |            |

---

Symmetry transformations used to generate equivalent atoms:

<sup>i</sup>  $x, y, z+1$     <sup>ii</sup>  $x, y, z-1$



SM10. Hydrogen-Bonding Angles (in °) and Distances (in Å) for **1**. The characters D and A, resp., refer to hydrogen donor and acceptor

| D   | H    | A   | D–H    | H...A  | D...A    | D–H...A | Symmetry*      |
|-----|------|-----|--------|--------|----------|---------|----------------|
| O7  | H71  | O11 | 0.8500 | 2.3600 | 2.767(6) | 110.00  | x, y, z        |
| O7  | H72  | O4  | 0.8600 | 1.9500 | 2.786(6) | 167.00  | -x+2, -y, -z+1 |
| O8  | H81  | O10 | 0.8500 | 2.5300 | 3.218(7) | 139.00  | x, y, z        |
| O8  | H82  | O13 | 0.8600 | 1.9300 | 2.759(6) | 162.00  | -x+1, -y, -z+1 |
| O9  | H92  | O3  | 0.8500 | 1.9500 | 2.776(6) | 162.00  | -x+2, -y+1, -z |
| O10 | H101 | O9  | 0.8600 | 2.3800 | 2.928(7) | 123.00  | x-1, y, z      |
| O11 | H111 | O8  | 0.8600 | 2.1900 | 2.751(6) | 123.00  | x, y, z+1      |
| O11 | H112 | O1  | 0.8500 | 1.8900 | 2.745(6) | 177.00  | -x+2, -y, -z+1 |
| O12 | H121 | O7  | 0.8600 | 2.4700 | 2.752(6) | 100.00  | x, y, z        |
| O12 | H122 | O10 | 0.8500 | 2.4600 | 2.798(7) | 104.00  | x, y, z        |
| O12 | H122 | O11 | 0.8500 | 2.3300 | 2.743(6) | 110.00  | -x+1, -y, -z+1 |
| O13 | H131 | O10 | 0.8600 | 2.5300 | 2.863(7) | 104.00  | x, y, z+1      |
| O13 | H132 | O5  | 0.8500 | 1.9000 | 2.733(6) | 166.00  | x-1, y, z      |
| C4  | H4   | O3  | 0.9500 | 2.5600 | 3.143(8) | 120.00  | x, y, z        |
| C7  | H7   | O6  | 0.9500 | 2.4800 | 3.069(7) | 120.00  | x, y, z        |

\* Symmetry transformations used to generate equivalent A atoms (hydrogen acceptor).

## Crystallographic Supplementary Material for $[\text{MnCu}(\text{dmopba})(\text{DMSO})_3]_n \cdot n\text{DMSO}$ (**2**)

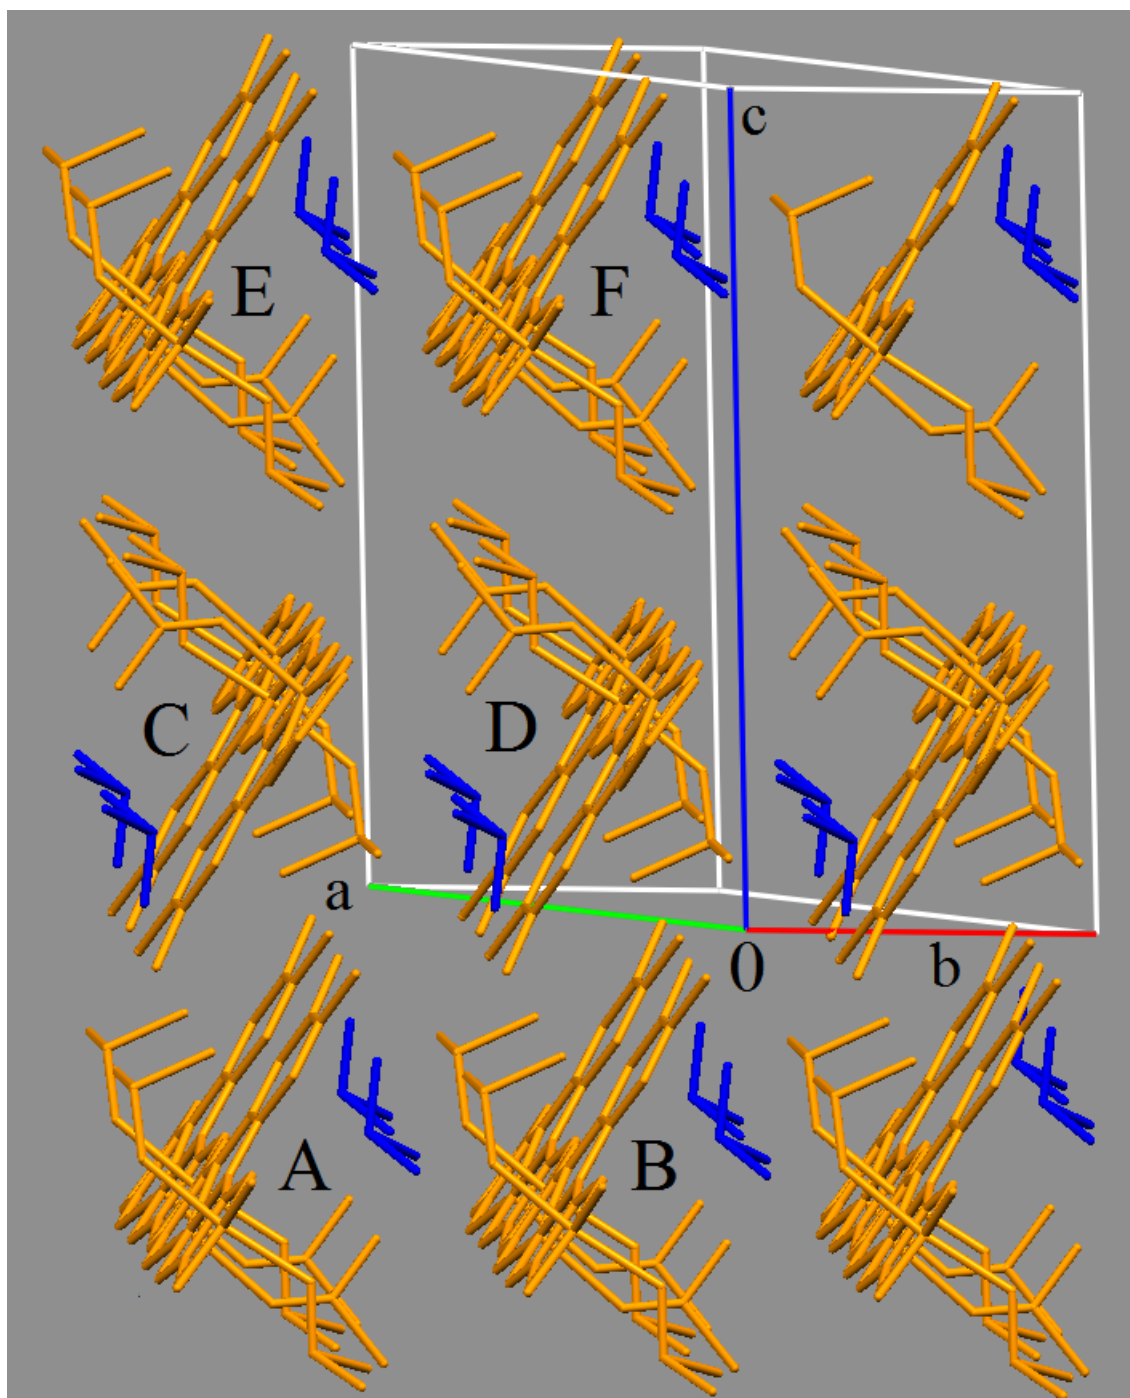

SM11. Mercury\* view of **2** displaying the crystal packing onto plane (110). It is possible to see the double chain (in orange) formed along [110] and the channel filled by non-coordinated DMSO molecules (in blue). Capital letter identify parallel chains along [110].

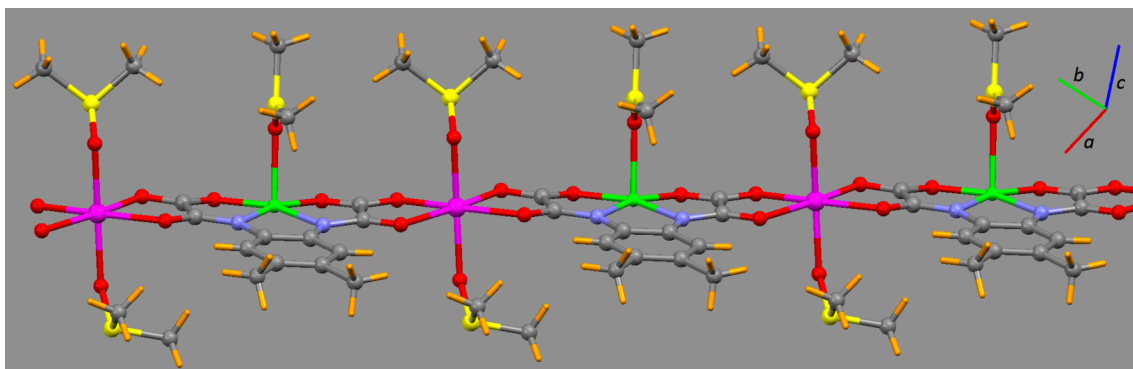

SM12. Mercury\* view of **2** displaying an individual chain along [110] direction. The aromatic rings lying in a same side of the chain. Non-coordinated DMSO molecules were omitted for clarity.

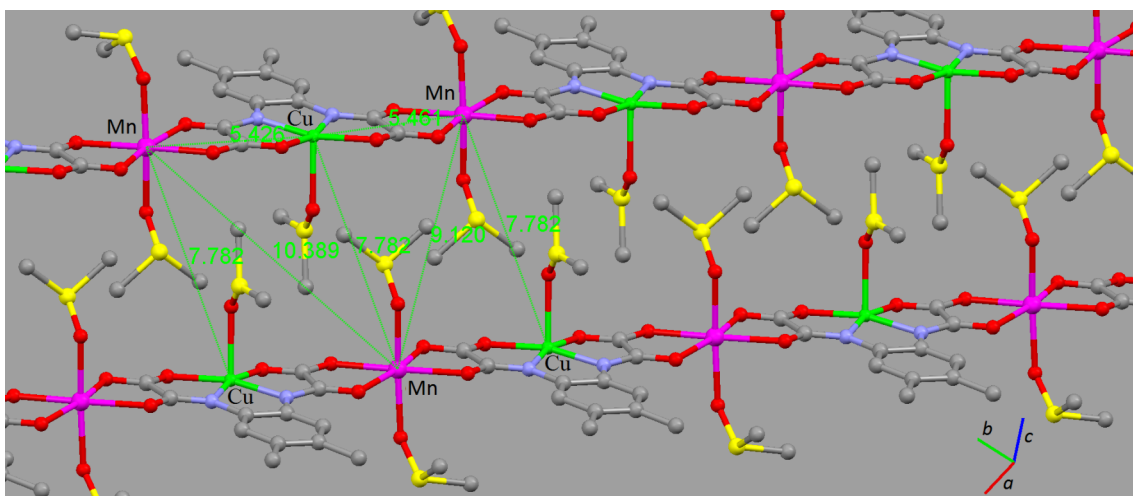

SM13. Mercury\* view of **2** highlighting the closest metal–metal separations between chains C and E (see SM11). Non-coordinated DMSO and hydrogen atoms were omitted for clarity.

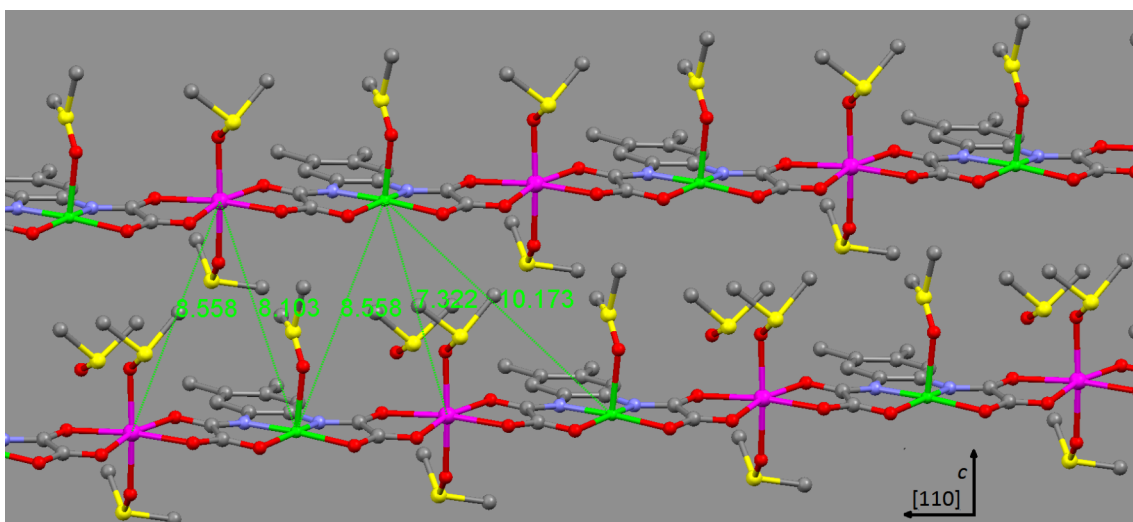

SM14. Mercury\* view of **2** highlighting the closest metal–metal separations between chains C and D (see SM11). Hydrogen atoms were omitted for clarity.

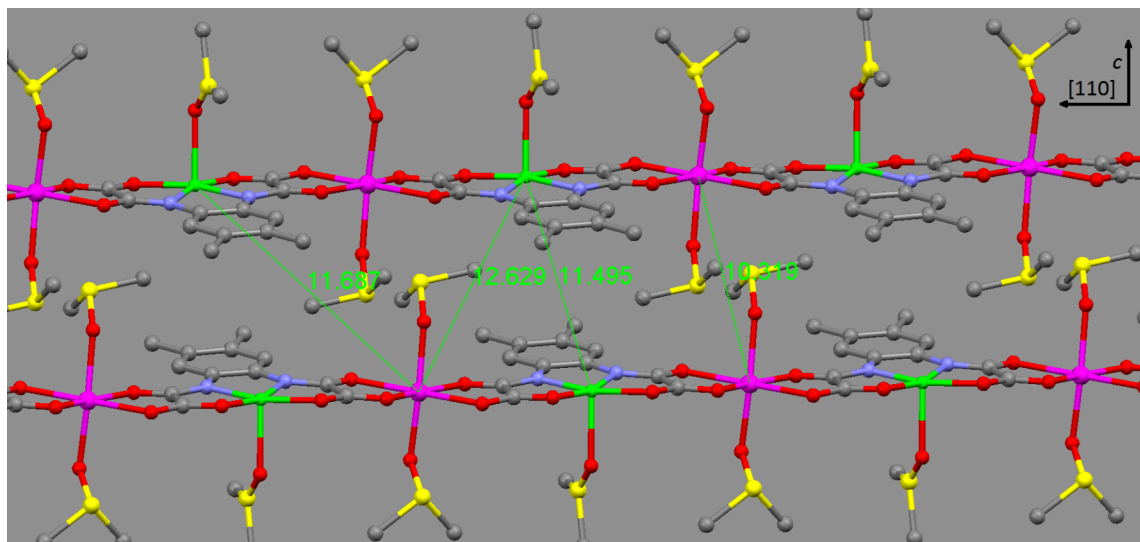

SM15. Mercury\* view of **2** highlighting the closest metal–metal separations between chains A and C (see SM11). Non-coordinated DMSO and hydrogen atoms were omitted for clarity.

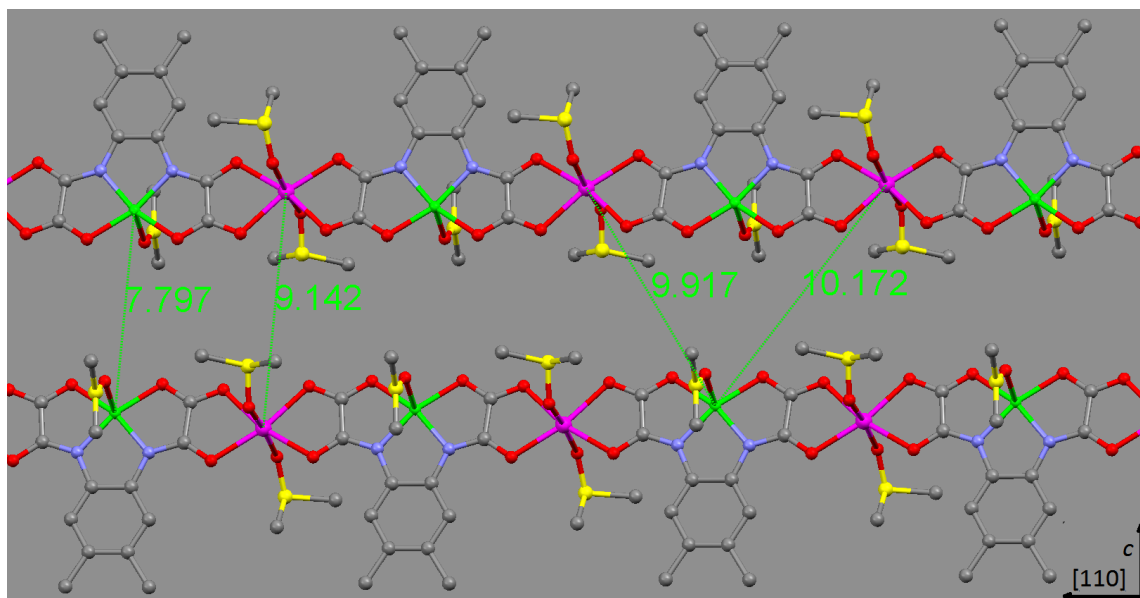

SM16. Mercury\* view of **2** highlighting the closest metal–metal separations between chains C and F (see SM11). Non-coordinated DMSO and hydrogen atoms were omitted for clarity.

SM17. Crystal data and structure refinement for **2**.

|                                   |                                                                                                               |                              |
|-----------------------------------|---------------------------------------------------------------------------------------------------------------|------------------------------|
| Empirical formula                 | C <sub>20</sub> H <sub>32</sub> Cu <sub>1</sub> Mn <sub>1</sub> N <sub>2</sub> O <sub>10</sub> S <sub>4</sub> |                              |
| Formula weight                    | 707.2                                                                                                         |                              |
| Temperature                       | 250(2) K                                                                                                      |                              |
| Wavelength                        | 0.71073 Å                                                                                                     |                              |
| Crystal system                    | Triclinic                                                                                                     |                              |
| Space group                       | P $\bar{1}$                                                                                                   |                              |
| Unit cell dimensions              | a = 8.558(1) Å                                                                                                | $\alpha = 93.146(17)^\circ$  |
|                                   | b = 10.173(2) Å                                                                                               | $\beta = 98.93(2)^\circ$     |
|                                   | c = 18.201(6) Å                                                                                               | $\gamma = 110.158(14)^\circ$ |
| Volume                            | 1459.4(6) Å <sup>3</sup>                                                                                      |                              |
| Z                                 | 2                                                                                                             |                              |
| Density (calculated)              | 1.609 Mg/m <sup>3</sup>                                                                                       |                              |
| Absorption coefficient            | 1.499 mm <sup>-1</sup>                                                                                        |                              |
| F(000)                            | 728                                                                                                           |                              |
| Crystal size                      | 0.21 x 0.18 x 0.03 mm <sup>3</sup>                                                                            |                              |
| Theta range for data collection   | 3.03 to 30°                                                                                                   |                              |
| Index ranges                      | -12 ≤ h ≤ 10, -14 ≤ k ≤ 14, -24 ≤ l ≤ 25                                                                      |                              |
| Reflections collected             | 23081                                                                                                         |                              |
| Independent reflections           | 8152 [R(int) = 0.0581]                                                                                        |                              |
| Completeness to theta = 30°       | 98.9 %                                                                                                        |                              |
| Absorption correction             | multi-scan                                                                                                    |                              |
| Refinement method                 | Full-matrix least-squares on F <sup>2</sup>                                                                   |                              |
| Data / restraints / parameters    | 8152 / 0 / 373                                                                                                |                              |
| Goodness-of-fit on F <sup>2</sup> | 1.056                                                                                                         |                              |
| Final R indices [I > 2σ(I)]       | R1 = 0.053, wR2 = 0.1281                                                                                      |                              |
| R indices (all data)              | R1 = 0.1013, wR2 = 0.1543                                                                                     |                              |
| Largest diff. peak and hole       | 2.017 and -2.176 e.Å <sup>-3</sup>                                                                            |                              |

SM18. Atomic coordinates ( $\times 10^4$ ) and equivalent isotropic displacement parameters ( $\text{\AA}^2 \times 10^3$ ) for **2**.  $U(\text{eq})$  is defined as one third of the trace of the orthogonalized  $U^{ij}$  tensor.

|        | x          | y         | z        | U(eq)   |
|--------|------------|-----------|----------|---------|
| Cu(1)  | 7577(1)    | 728(1)    | 3164(1)  | 31(1)   |
| Mn(1)  | 12136(2)   | 5871(1)   | 2859(1)  | 32(1)   |
| S(1)   | 11149(5)   | 7266(4)   | 4294(2)  | 61(1)   |
| S(2)   | 12870(3)   | 4247(3)   | 1302(1)  | 42(1)   |
| S(3)   | 5428(16)   | 2482(15)  | 3863(4)  | 224(6)  |
| O(1)   | 6939(8)    | -1029(6)  | 3659(3)  | 37(1)   |
| O(2)   | 4679(8)    | -3012(6)  | 3551(3)  | 38(1)   |
| O(3)   | 3229(7)    | -2338(6)  | 2262(3)  | 37(1)   |
| O(4)   | 9872(7)    | 2023(6)   | 3679(3)  | 39(1)   |
| O(5)   | 11639(8)   | 4206(7)   | 3619(3)  | 38(1)   |
| O(6)   | 9652(7)    | 4342(6)   | 2331(3)  | 35(1)   |
| O(7)   | 6373(15)   | 1787(13)  | 3966(5)  | 88(4)   |
| O(8)   | 10949(10)  | 7064(8)   | 3456(4)  | 51(2)   |
| O(9)   | 13180(9)   | 4730(8)   | 2128(4)  | 50(2)   |
| N(1)   | 5619(8)    | -322(7)   | 2412(4)  | 30(1)   |
| N(2)   | 7912(8)    | 2104(7)   | 2447(4)  | 30(1)   |
| C(1)   | 5483(11)   | -1866(8)  | 3330(5)  | 33(2)   |
| C(2)   | 4647(9)    | -1520(8)  | 2595(5)  | 29(2)   |
| C(3)   | 5356(9)    | 379(8)    | 1793(4)  | 27(2)   |
| C(4)   | 4002(10)   | -125(8)   | 1182(4)  | 30(2)   |
| C(5)   | 3904(10)   | 684(8)    | 592(4)   | 29(2)   |
| C(6)   | 5131(11)   | 2016(9)   | 610(4)   | 32(2)   |
| C(7)   | 6459(10)   | 2522(9)   | 1224(4)  | 30(2)   |
| C(8)   | 6602(10)   | 1717(8)   | 1805(4)  | 28(2)   |
| C(9)   | 9248(10)   | 3252(8)   | 2658(4)  | 27(2)   |
| C(10)  | 10312(9)   | 3157(8)   | 3374(4)  | 26(2)   |
| C(11)  | 2453(12)   | 45(11)    | -67(5)   | 40(2)   |
| C(12)  | 5036(13)   | 2907(11)  | -17(5)   | 42(2)   |
| C(13A) | 11810(170) | 9170(50)  | 4600(50) | 270(70) |
| C(14A) | 9080(80)   | 6790(100) | 4490(20) | 140(30) |
| C(13B) | 11330(90)  | 8950(50)  | 4525(16) | 120(20) |
| C(14B) | 9090(70)   | 6240(90)  | 4430(30) | 150(40) |
| C(15)  | 11422(15)  | 4967(14)  | 841(6)   | 57(3)   |
| C(16)  | 11442(17)  | 2473(12)  | 1197(8)  | 63(3)   |
| C(17)  | 4680(30)   | 3120(30)  | 4596(8)  | 122(9)  |
| C(18)  | 4320(60)   | 2640(60)  | 3145(11) | 300(30) |
| S(4)   | -681(3)    | -2834(3)  | 1673(1)  | 44(1)   |
| O(10)  | -1025(13)  | -2908(12) | 827(4)   | 75(3)   |
| C(19)  | -75(18)    | -1032(13) | 2033(8)  | 68(3)   |
| C(20)  | -2662(16)  | -3453(15) | 1965(8)  | 67(3)   |

SM19. Bond lengths [Å] for **2**.

---

|             |           |             |           |
|-------------|-----------|-------------|-----------|
| Cu(1)–N(1)  | 1.927(6)  | O(3)–C(2)#1 | 1.246(9)  |
| Cu(1)–N(2)  | 1.945(6)  | O(4)–C(10)  | 1.271(9)  |
| Cu(1)–O(1)  | 1.991(6)  | O(5)–C(10)  | 1.258(9)  |
| Cu(1)–O(4)  | 1.995(6)  | O(6)–C(9)   | 1.255(9)  |
| Cu(1)–O(7)  | 2.327(9)  | N(1)–C(2)   | 1.311(10) |
| Mn(1)–O(3)  | 2.175(6)  | N(1)–C(3)   | 1.397(10) |
| Mn(1)–O(8)  | 2.176(8)  | N(2)–C(9)   | 1.309(10) |
| Mn(1)–O(6)  | 2.188(6)  | N(2)–C(8)   | 1.420(9)  |
| Mn(1)–O(9)  | 2.198(7)  | C(1)–O(2)#2 | 1.256(10) |
| Mn(1)–O(2)  | 2.214(6)  | C(1)–C(2)   | 1.534(11) |
| Mn(1)–O(5)  | 2.216(6)  | C(2)–O(3)#2 | 1.246(9)  |
| S(1)–O(8)   | 1.503(7)  | C(3)–C(4)   | 1.403(10) |
| S(1)–C(13B) | 1.69(4)   | C(3)–C(8)   | 1.407(10) |
| S(1)–C(14B) | 1.77(5)   | C(4)–C(5)   | 1.398(11) |
| S(1)–C(14A) | 1.77(6)   | C(5)–C(6)   | 1.394(11) |
| S(1)–C(13A) | 1.84(4)   | C(5)–C(11)  | 1.517(10) |
| S(2)–O(9)   | 1.510(7)  | C(6)–C(7)   | 1.395(11) |
| S(2)–C(15)  | 1.774(12) | C(6)–C(12)  | 1.505(11) |
| S(2)–C(16)  | 1.777(12) | C(7)–C(8)   | 1.389(11) |
| S(3)–O(7)   | 1.246(10) | C(9)–C(10)  | 1.497(10) |
| S(3)–C(18)  | 1.54(2)   | S(4)–O(10)  | 1.515(8)  |
| S(3)–C(17)  | 1.749(16) | S(4)–C(20)  | 1.771(12) |
| O(1)–C(1)   | 1.272(10) | S(4)–C(19)  | 1.780(13) |
| O(2)–C(1)#1 | 1.256(10) |             |           |

---

Symmetry transformations used to generate equivalent atoms:

#1  $x+1, y+1, z$  #2  $x-1, y-1, z$

|                    |           |                  |          |
|--------------------|-----------|------------------|----------|
| N(1)–Cu(1)–N(2)    | 82.8(3)   | C(10)–O(4)–Cu(1) | 110.3(5) |
| N(1)–Cu(1)–O(1)    | 84.1(2)   | C(10)–O(5)–Mn(1) | 113.4(5) |
| N(2)–Cu(1)–O(1)    | 165.1(3)  | C(9)–O(6)–Mn(1)  | 112.0(5) |
| N(1)–Cu(1)–O(4)    | 163.3(3)  | S(3)–O(7)–Cu(1)  | 133.0(7) |
| N(2)–Cu(1)–O(4)    | 82.8(3)   | S(1)–O(8)–Mn(1)  | 124.1(4) |
| O(1)–Cu(1)–O(4)    | 109.0(2)  | S(2)–O(9)–Mn(1)  | 136.3(4) |
| N(1)–Cu(1)–O(7)    | 101.0(4)  | C(2)–N(1)–C(3)   | 129.7(6) |
| N(2)–Cu(1)–O(7)    | 97.8(4)   | C(2)–N(1)–Cu(1)  | 115.0(5) |
| O(1)–Cu(1)–O(7)    | 91.5(4)   | C(3)–N(1)–Cu(1)  | 114.9(5) |
| O(4)–Cu(1)–O(7)    | 89.4(4)   | C(9)–N(2)–C(8)   | 131.3(7) |
| O(3)–Mn(1)–O(8)    | 90.5(3)   | C(9)–N(2)–Cu(1)  | 114.7(5) |
| O(3)–Mn(1)–O(6)    | 117.0(2)  | C(8)–N(2)–Cu(1)  | 113.9(5) |
| O(8)–Mn(1)–O(6)    | 90.8(3)   | O(2)#2–C(1)–O(1) | 124.3(8) |
| O(3)–Mn(1)–O(9)    | 85.4(3)   | O(2)#2–C(1)–C(2) | 116.2(7) |
| O(8)–Mn(1)–O(9)    | 172.9(3)  | O(1)–C(1)–C(2)   | 119.4(7) |
| O(6)–Mn(1)–O(9)    | 86.1(3)   | O(3)#2–C(2)–N(1) | 129.2(7) |
| O(3)–Mn(1)–O(2)    | 76.4(2)   | O(3)#2–C(2)–C(1) | 120.1(7) |
| O(8)–Mn(1)–O(2)    | 93.5(3)   | N(1)–C(2)–C(1)   | 110.7(6) |
| O(6)–Mn(1)–O(2)    | 165.9(2)  | N(1)–C(3)–C(4)   | 126.4(7) |
| O(9)–Mn(1)–O(2)    | 91.1(3)   | N(1)–C(3)–C(8)   | 114.7(6) |
| O(3)–Mn(1)–O(5)    | 166.5(2)  | C(4)–C(3)–C(8)   | 118.9(7) |
| O(8)–Mn(1)–O(5)    | 92.8(3)   | C(5)–C(4)–C(3)   | 120.5(7) |
| O(6)–Mn(1)–O(5)    | 76.1(2)   | C(6)–C(5)–C(4)   | 120.5(7) |
| O(9)–Mn(1)–O(5)    | 92.6(3)   | C(6)–C(5)–C(11)  | 121.9(7) |
| O(2)–Mn(1)–O(5)    | 90.3(2)   | C(4)–C(5)–C(11)  | 117.7(7) |
| O(8)–S(1)–C(13B)   | 106.3(12) | C(7)–C(6)–C(5)   | 118.8(7) |
| O(8)–S(1)–C(14B)   | 102(2)    | C(7)–C(6)–C(12)  | 120.0(8) |
| C(13B)–S(1)–C(14B) | 105(4)    | C(5)–C(6)–C(12)  | 121.2(7) |
| O(8)–S(1)–C(14A)   | 106.4(15) | C(8)–C(7)–C(6)   | 121.5(7) |
| C(13B)–S(1)–C(14A) | 86(4)     | C(7)–C(8)–C(3)   | 119.8(7) |
| O(8)–S(1)–C(13A)   | 108(3)    | C(7)–C(8)–N(2)   | 126.6(7) |
| C(14B)–S(1)–C(13A) | 115(5)    | C(3)–C(8)–N(2)   | 113.7(6) |
| C(14A)–S(1)–C(13A) | 96(5)     | O(6)–C(9)–N(2)   | 126.8(7) |
| O(9)–S(2)–C(15)    | 107.4(5)  | O(6)–C(9)–C(10)  | 121.2(7) |
| O(9)–S(2)–C(16)    | 104.6(6)  | N(2)–C(9)–C(10)  | 112.0(6) |
| C(15)–S(2)–C(16)   | 96.9(6)   | O(5)–C(10)–O(4)  | 124.1(7) |
| O(7)–S(3)–C(18)    | 131.3(12) | O(5)–C(10)–C(9)  | 116.8(6) |
| O(7)–S(3)–C(17)    | 122.2(9)  | O(4)–C(10)–C(9)  | 119.1(6) |
| C(18)–S(3)–C(17)   | 104.7(10) | O(10)–S(4)–C(20) | 107.6(6) |
| C(1)–O(1)–Cu(1)    | 109.4(5)  | O(10)–S(4)–C(19) | 107.0(7) |
| C(1)#1–O(2)–Mn(1)  | 113.7(5)  | C(20)–S(4)–C(19) | 97.3(7)  |
| C(2)#1–O(3)–Mn(1)  | 113.2(5)  |                  |          |

Symmetry transformations used to generate equivalent atoms:

#1 x+1,y+1,z #2 x-1,y-1,z



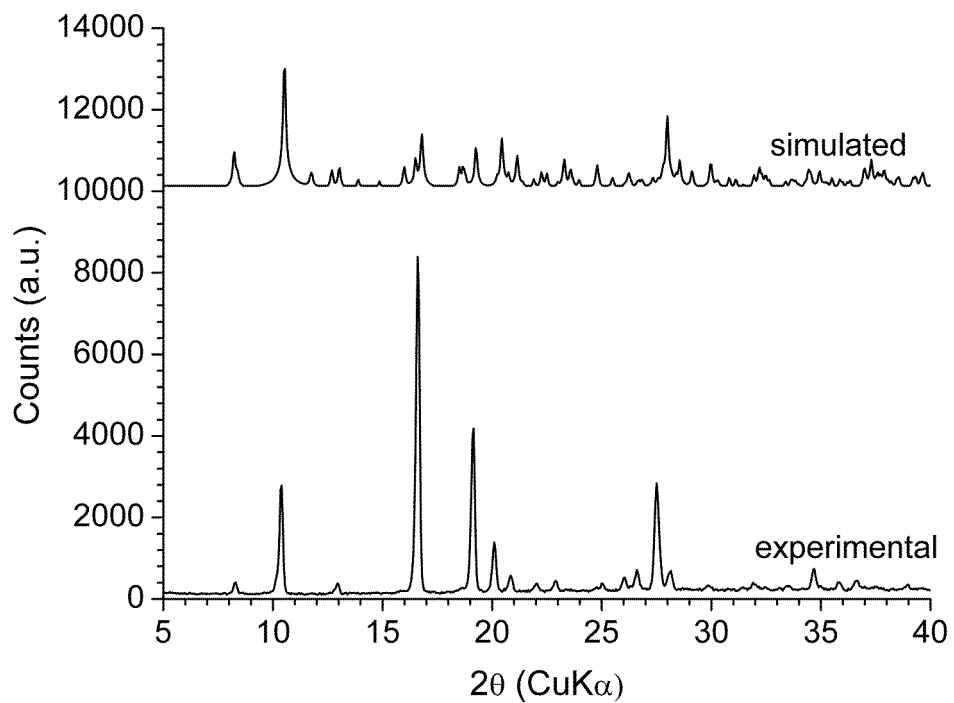

SM21. X-ray powder pattern for the compound **1** with  $2\theta$  in the 5–40 range. Simulated X-ray powder diffraction pattern was calculated using Mercury®.

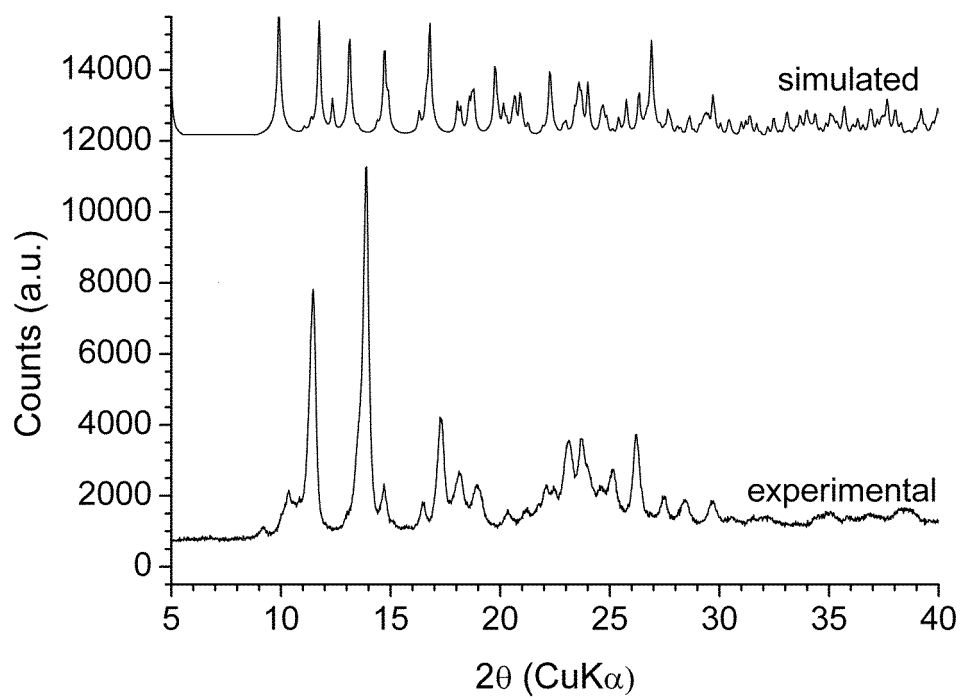

SM22. X-ray powder pattern for the compound **2** with  $2\theta$  in the 5–40 range. Simulated X-ray powder diffraction pattern was calculated using Mercury®.
